# Supplementary material for: Construction and application of a new cell electrochemical detecting system based on the hyposmotic principle
Source: Royal Society of Chemistry journal article supplement (doi:10.1039/c6an02114j), 2017-01-01
Supplement: c6an02114j1.pdf [file c6an02114j1.pdf]

## Supplementary material

### Construction and Application of A New Cell Electrochemical Detecting System

#### Based on the Hyposmotic Principle

Ji-Wen Cui,<sup>a</sup> Qian Wang,<sup>a</sup> Sheng Bi,<sup>b</sup> Jing Zhang,<sup>a</sup> Jin-Ling Zhu,<sup>b</sup> Ji-Guang Liu<sup>†</sup><sup>b</sup> and Dong-mei Wu<sup>†a</sup>

<sup>a</sup>College of Pharmacy, Jiamusi University, Jiamusi, 154000, China

<sup>b</sup>College of Medicine, Jiamusi University, Jiamusi, 154000, China

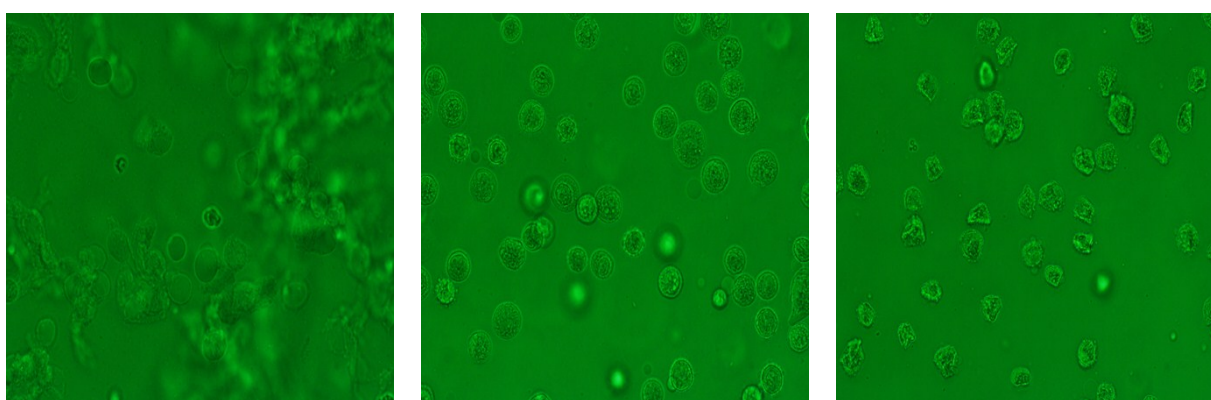

**Fig. S1** Micrographs of the fragmented MCF-7 cell suspension in the (a) hypo-CDS, (b) iso-CDS and (c) hyper-CDS. Cell concentration,  $5 \times 10^6$  cells  $\text{mL}^{-1}$ .

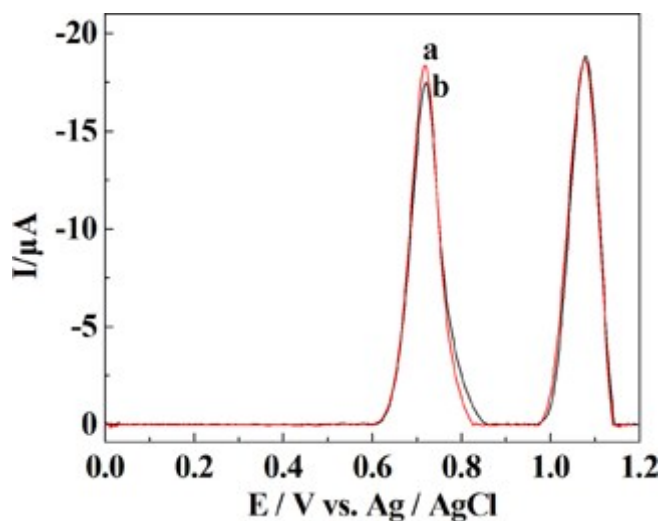

**Fig. S2** Baseline-corrected LSV of the fragmented MCF-7 cell suspension (a) with and (b) without ultrasonic treatment. Cell concentration,  $5 \times 10^6$  cells  $\text{mL}^{-1}$ .

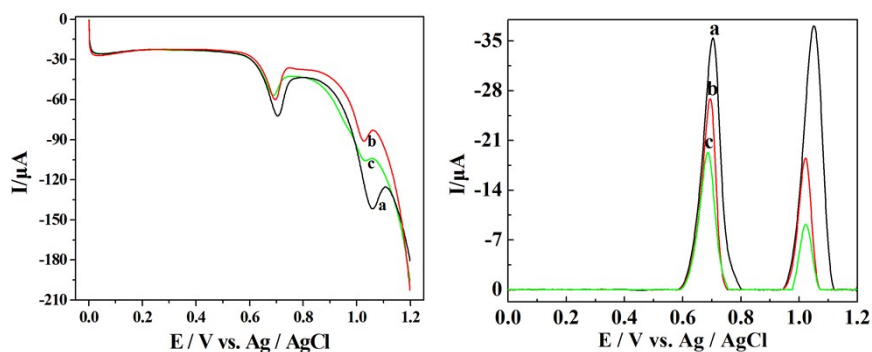

Fig. S3 The original figure and baseline-corrected of LSVs of the fragmented MCF-7 cell suspension in the (a) hypo-CDS, (b) iso-CDS and (c) hyper-CDS. Cell concentration,  $5 \times 10^6$  cells  $\text{mL}^{-1}$ .

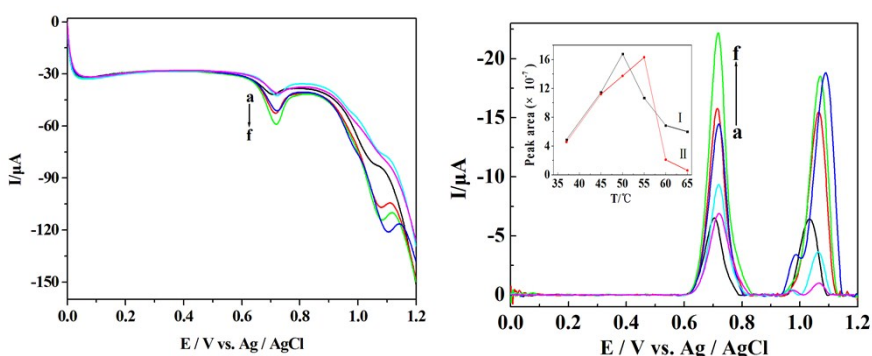

Fig. S4 (A) The original figure and baseline-corrected of LSVs in the hypo-CDS with the different fragmented temperature: a) 37 °C, (b) 65 °C, (c) 60 °C, (d) 45 °C, (e) 55 °C, and (f) 50 °C.

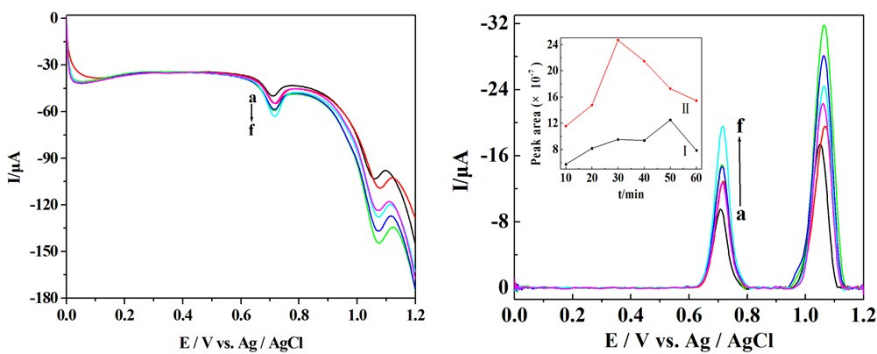

Fig. S4 (B) The original figure and baseline-corrected of LSVs in the hypo-CDS with the different fragmented time: (a) 10 min, (b) 60 min, (c) 20 min, (d) 40 min, (e) 30 min, and (f) 50 min. Cell concentration,  $5 \times 10^6$  cells  $\text{mL}^{-1}$ .

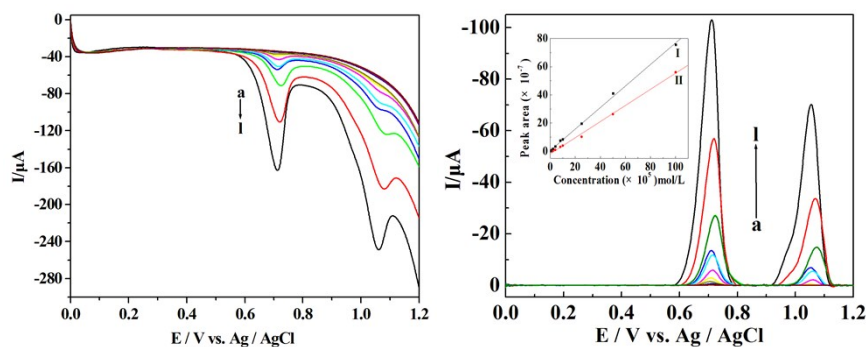

Fig. S5 (A) The original figure and baseline-corrected of LSVs in the hypo-CDS at different concentration, (a)  $1.0 \times 10^4$ , (b)  $2.5 \times 10^4$ , (c)  $5.0 \times 10^4$ , (d)  $1.0 \times 10^5$ , (e)  $2.0 \times 10^5$ , (f)  $4.0 \times 10^5$ , (g)  $8.0 \times 10^5$ , (h)  $1.0 \times 10^6$ , (i)  $2.5 \times 10^6$ , (j)  $5.0 \times 10^6$ , (k)  $8.0 \times 10^6$ , and (l)  $1.0 \times 10^7$  cells  $\text{mL}^{-1}$ .

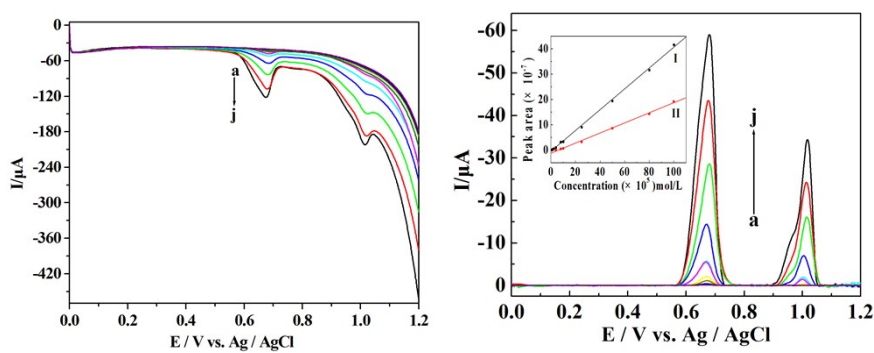

Fig. S5 (B) The original figure and baseline-corrected of LSVs in the hyper-CDS at different concentration, (a)  $5 \times 10^4$ , (b)  $1.0 \times 10^5$ , (c)  $2.0 \times 10^5$ , (d)  $4.0 \times 10^5$ , (e)  $8.0 \times 10^5$ , (f)  $1.0 \times 10^6$ , (g)  $2.5 \times 10^6$ , (h)  $5.0 \times 10^6$ , (i)  $8.0 \times 10^6$ , and (j)  $1.0 \times 10^7$  cells  $\text{mL}^{-1}$ .

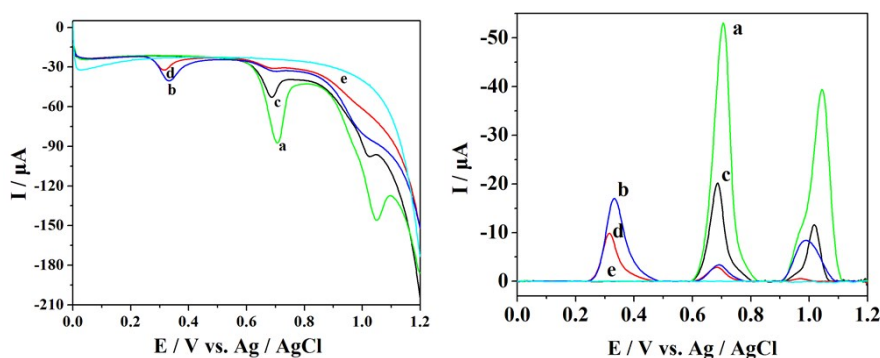

Fig. S6 The original figure and baseline-corrected of LSVs in the hypo-CDS (a) without and (b) with XO; LSVs in the hyper-CDS (c) without and (d) with XO; (e) XO.

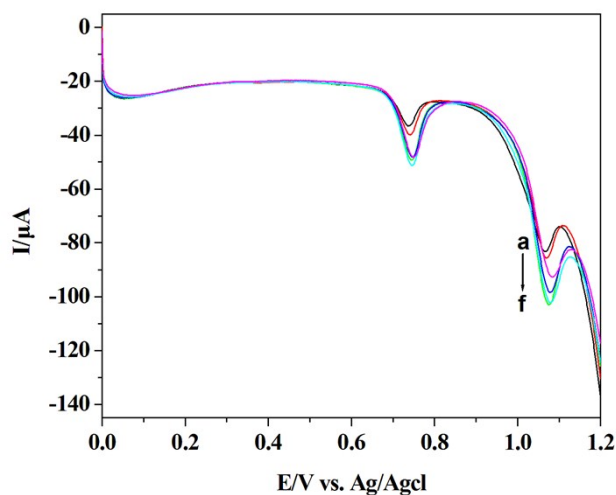

Fig. S7 LSVs in the iso-CDS with the different fragmented time: (a) 10 min, (b)20 min, (c)60 min, (d) 50 min, (e) 40 min, and (f) 30 min.

**Table S1** The peak area and concentration of purine in the fragmented MCF-7 cell suspension.

|                                           | G/X                  | A/H                  | G                    | X                                 | A                   | H                                 |
|-------------------------------------------|----------------------|----------------------|----------------------|-----------------------------------|---------------------|-----------------------------------|
| S <sup>a</sup> ( $\times 10^{-7}$ )       | 13.59( $\pm 0.384$ ) | 6.46( $\pm 0.283$ )  | 2.13( $\pm 0.041$ )  | 11.46( $\pm 0.384$ ) <sup>e</sup> | 0.28( $\pm 0.000$ ) | 6.46( $\pm 0.312$ ) <sup>e</sup>  |
| S <sup>b</sup> ( $\times 10^{-7}$ )       | 38.06( $\pm 0.384$ ) | 31.92( $\pm 0.283$ ) | 2.60 ( $\pm 0.041$ ) | 35.46( $\pm 0.384$ ) <sup>e</sup> | 8.30( $\pm 0.000$ ) | 23.62( $\pm 0.312$ ) <sup>e</sup> |
| C <sup>c</sup> ( $\mu\text{mol L}^{-1}$ ) |                      |                      | 3.785                | 10.174                            | 2.468               | 10.787                            |
| C <sup>d</sup> ( $\mu\text{mol L}^{-1}$ ) |                      |                      | 4.175                | 31.973                            | 11.469              | 33.883                            |

<sup>a</sup> Peak area for heated fragmented, <sup>b</sup> Peak area for composite fragmented, <sup>c</sup> Calculated concentration for heated fragmented, <sup>d</sup> Calculated concentration for composite fragmented, <sup>e</sup>  $S_X = S_{G/X} - S_G$ ,  $S_H = S_{A/H} - S_A$ .
